# Supplementary material
Source: PubMed Central journal article supplement (PMC8498937)
Supplement: jamapediatr-e214251-s001.pdf [file jamapediatr-e214251-s001.pdf]

## Supplemental Online Content

DeSilva MB, Haapala J, Vazquez-Benitez G, et al. Association of the COVID-19 pandemic with routine childhood vaccination rates and proportion up to date with vaccination across 8 US Health Systems in the Vaccine Safety Datalink. *JAMA Pediatr*. Published October 7, 2021. doi:10.1001/jamapediatrics.2021.4251

**eTable 1.** Minimum number of vaccine doses by age for up-to-date (UTD) classification

**eTable 2.** Proportion up-to-date and 95% confidence intervals, by age group, calendar month, year, and race/ethnicity

This supplemental material has been provided by the authors to give readers additional information about their work.

eTable 1. Minimum number of vaccine doses by age for up-to-date (UTD) classification

| Age              | Vaccine doses |      |      |      |         |     |     |     |
|------------------|---------------|------|------|------|---------|-----|-----|-----|
|                  | Hep B         | Rota | DTaP | Hib  | PCV13   | IPV | MMR | VZV |
| <b>7 months</b>  | 2             | 2    | 3    | 2    | 3       | 2   | -   | -   |
| <b>18 months</b> | 3             | -    | 4    | 3    | 4       | 3   | 1   | 1   |
|                  | -             | HPV  | DTaP | Tdap | MenACWY | IPV | MMR | VZV |
| <b>6 years</b>   | -             | -    | 5    | -    | -       | 4   | 2   | 2   |
| <b>13 years</b>  | -             | 2    | -    | 1    | 1       | -   | -   | -   |
| <b>18 years</b>  | -             | 2    | -    | 1    | 2       | -   | -   | -   |

Hep B = Hepatitis B vaccine; Rota = rotavirus vaccine; DTaP = diphtheria, tetanus, and acellular pertussis vaccine; Hib = *Haemophilus influenzae* type B conjugate vaccine; PCV13 = pneumococcal conjugate vaccine, 13-valent; IPV = inactivated polio vaccine; MMR = measles, mumps, rubella vaccine; VZV = varicella zoster vaccine; HPV = human papillomavirus vaccine (quadrivalent or nine-valent); Tdap = tetanus toxoid, reduced diphtheria toxoid, acellular pertussis vaccine; MenACWY = quadrivalent meningococcal conjugate vaccine.

eTable 2.

| Age and race/ethnicity | 2019             |                  |                  | 2020             |                  |                  |
|------------------------|------------------|------------------|------------------|------------------|------------------|------------------|
|                        | Feb              | May              | Sep              | Feb              | May              | Sep              |
| <b>7 months</b>        | 0.81 (0.80–0.82) | 0.82 (0.81–0.83) | 0.81 (0.80–0.82) | 0.81 (0.80–0.82) | 0.72 (0.71–0.73) | 0.74 (0.73–0.76) |
| Asian <sup>a</sup>     | 0.91 (0.89–0.93) | 0.91 (0.89–0.92) | 0.89 (0.87–0.91) | 0.88 (0.87–0.90) | 0.81 (0.79–0.83) | 0.88 (0.86–0.90) |
| Black <sup>a</sup>     | 0.64 (0.59–0.69) | 0.70 (0.64–0.75) | 0.62 (0.57–0.68) | 0.68 (0.63–0.73) | 0.54 (0.49–0.60) | 0.61 (0.55–0.67) |
| Hispanic               | 0.81 (0.79–0.83) | 0.79 (0.77–0.81) | 0.80 (0.78–0.82) | 0.82 (0.80–0.84) | 0.71 (0.69–0.74) | 0.76 (0.74–0.78) |
| All other races        | 0.78 (0.76–0.81) | 0.82 (0.79–0.84) | 0.80 (0.77–0.82) | 0.80 (0.77–0.82) | 0.70 (0.67–0.72) | 0.65 (0.62–0.68) |
| White <sup>a</sup>     | 0.81 (0.79–0.82) | 0.81 (0.79–0.83) | 0.81 (0.80–0.83) | 0.81 (0.79–0.82) | 0.72 (0.70–0.74) | 0.74 (0.72–0.76) |
| <b>18 months</b>       | 0.60 (0.59–0.61) | 0.60 (0.58–0.61) | 0.61 (0.60–0.62) | 0.61 (0.60–0.62) | 0.56 (0.55–0.57) | 0.57 (0.56–0.58) |
| Asian <sup>a</sup>     | 0.79 (0.77–0.82) | 0.76 (0.73–0.79) | 0.76 (0.74–0.79) | 0.78 (0.76–0.80) | 0.76 (0.74–0.79) | 0.76 (0.74–0.78) |
| Black <sup>a</sup>     | 0.50 (0.46–0.54) | 0.48 (0.44–0.52) | 0.54 (0.50–0.58) | 0.49 (0.45–0.53) | 0.41 (0.36–0.45) | 0.41 (0.37–0.45) |
| Hispanic               | 0.58 (0.56–0.60) | 0.58 (0.56–0.60) | 0.58 (0.56–0.60) | 0.59 (0.58–0.61) | 0.56 (0.54–0.58) | 0.54 (0.52–0.56) |
| All other races        | 0.57 (0.55–0.60) | 0.57 (0.55–0.60) | 0.60 (0.57–0.63) | 0.59 (0.57–0.62) | 0.54 (0.51–0.57) | 0.54 (0.52–0.57) |
| White <sup>a</sup>     | 0.58 (0.56–0.60) | 0.57 (0.55–0.59) | 0.58 (0.56–0.60) | 0.59 (0.57–0.61) | 0.52 (0.50–0.54) | 0.56 (0.54–0.58) |
| <b>6 years</b>         | 0.77 (0.76–0.78) | 0.77 (0.76–0.78) | 0.76 (0.76–0.77) | 0.79 (0.78–0.80) | 0.79 (0.78–0.79) | 0.77 (0.76–0.77) |
| Asian <sup>a</sup>     | 0.77 (0.74–0.79) | 0.77 (0.75–0.80) | 0.77 (0.75–0.80) | 0.81 (0.79–0.83) | 0.80 (0.78–0.82) | 0.78 (0.76–0.81) |
| Black <sup>a</sup>     | 0.75 (0.72–0.79) | 0.73 (0.69–0.76) | 0.71 (0.67–0.74) | 0.74 (0.70–0.77) | 0.76 (0.73–0.80) | 0.70 (0.67–0.74) |
| Hispanic               | 0.78 (0.76–0.80) | 0.78 (0.76–0.79) | 0.78 (0.77–0.80) | 0.81 (0.79–0.82) | 0.80 (0.79–0.82) | 0.79 (0.78–0.80) |
| All other races        | 0.73 (0.70–0.76) | 0.73 (0.71–0.76) | 0.74 (0.72–0.76) | 0.74 (0.72–0.77) | 0.72 (0.69–0.74) | 0.72 (0.70–0.74) |
| White <sup>a</sup>     | 0.78 (0.76–0.80) | 0.78 (0.76–0.79) | 0.76 (0.75–0.78) | 0.79 (0.78–0.81) | 0.80 (0.79–0.82) | 0.77 (0.75–0.78) |
| <b>13 years</b>        | 0.57 (0.56–0.58) | 0.58 (0.57–0.59) | 0.59 (0.58–0.60) | 0.59 (0.58–0.60) | 0.59 (0.58–0.60) | 0.56 (0.55–0.57) |
| Asian <sup>a</sup>     | 0.66 (0.63–0.69) | 0.68 (0.65–0.71) | 0.71 (0.68–0.73) | 0.71 (0.68–0.74) | 0.72 (0.69–0.74) | 0.68 (0.65–0.71) |
| Black <sup>a</sup>     | 0.55 (0.52–0.59) | 0.55 (0.51–0.58) | 0.58 (0.55–0.62) | 0.54 (0.50–0.58) | 0.52 (0.49–0.56) | 0.51 (0.47–0.54) |
| Hispanic               | 0.62 (0.60–0.64) | 0.65 (0.63–0.66) | 0.64 (0.62–0.65) | 0.64 (0.63–0.66) | 0.64 (0.62–0.66) | 0.62 (0.61–0.64) |
| All other races        | 0.50 (0.47–0.53) | 0.50 (0.47–0.53) | 0.53 (0.50–0.56) | 0.55 (0.52–0.58) | 0.50 (0.47–0.53) | 0.46 (0.43–0.48) |
| White <sup>a</sup>     | 0.52 (0.50–0.54) | 0.53 (0.51–0.55) | 0.53 (0.51–0.55) | 0.53 (0.51–0.55) | 0.55 (0.53–0.56) | 0.51 (0.50–0.53) |
| <b>18 years</b>        | 0.58 (0.57–0.59) | 0.58 (0.58–0.59) | 0.60 (0.59–0.61) | 0.61 (0.60–0.62) | 0.59 (0.58–0.60) | 0.60 (0.59–0.61) |
| Asian <sup>a</sup>     | 0.66 (0.63–0.69) | 0.65 (0.62–0.68) | 0.66 (0.64–0.69) | 0.63 (0.60–0.67) | 0.65 (0.62–0.68) | 0.66 (0.63–0.69) |
| Black <sup>a</sup>     | 0.58 (0.54–0.62) | 0.56 (0.52–0.60) | 0.60 (0.57–0.64) | 0.60 (0.56–0.64) | 0.62 (0.58–0.65) | 0.59 (0.55–0.62) |
| Hispanic               | 0.64 (0.62–0.66) | 0.65 (0.64–0.67) | 0.66 (0.64–0.68) | 0.68 (0.66–0.70) | 0.67 (0.65–0.69) | 0.67 (0.65–0.69) |
| All other races        | 0.49 (0.46–0.52) | 0.49 (0.46–0.52) | 0.51 (0.48–0.53) | 0.51 (0.48–0.54) | 0.49 (0.47–0.52) | 0.47 (0.45–0.50) |
| White <sup>a</sup>     | 0.52 (0.51–0.54) | 0.54 (0.52–0.56) | 0.56 (0.54–0.58) | 0.56 (0.54–0.58) | 0.54 (0.52–0.56) | 0.55 (0.53–0.57) |

Up-to-date definitions, by age: 7 months = receipt of 2 HepB, 2 Rota, 3DTaP, 2 Hib, 3 PCV13, 2 IPV; 18 months = receipt of 3 Hep B, 4 DTaP, 3 Hib, 4 PCV13, 3 IPV, 1 MMR, 1 VZV; 6 years = receipt of 5 DTaP, 4 IPV, 2 MMR, 2 VZV; 13 years = receipt of 2 HPV, 1 Tdap, 1 MenACWY; 18 years = receipt of 2 HPV, 1 Tdap, 2 MenACWY

<sup>a</sup>Non-Hispanic racial categories
